# Supplementary material for: Novel chytrid lineages dominate fungal sequences in diverse marine and freshwater habitats
Source: PubMed Central journal article supplement (PMC4957111; doi:10.1038/srep30120), 2016-07-22

**Supplementary Information for:**

**Novel chytrid lineages dominate fungal sequences in diverse marine and freshwater habitats**

André M. Comeau, Warwick F. Vincent, Louis Bernier & Connie Lovejoy

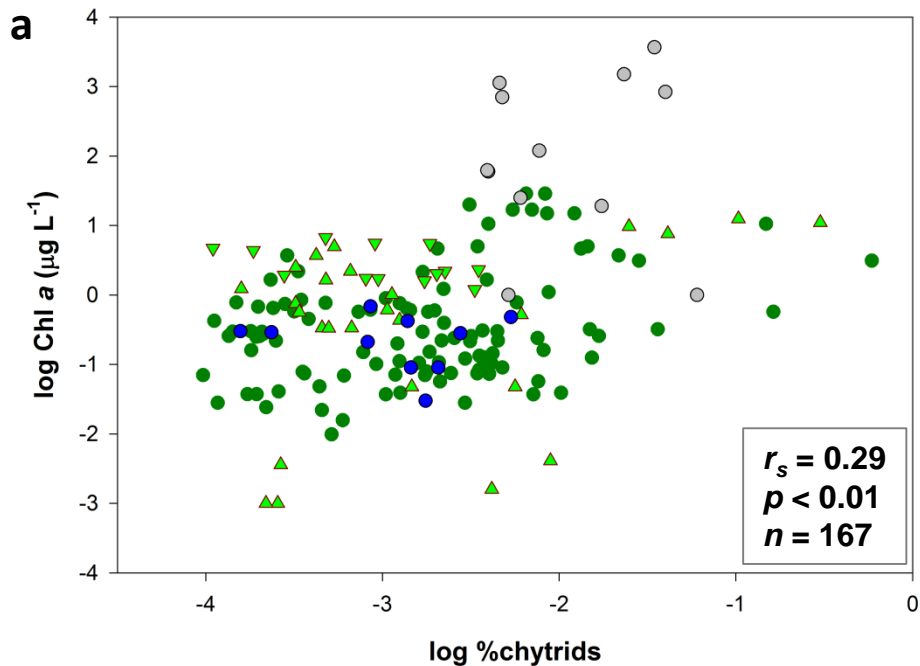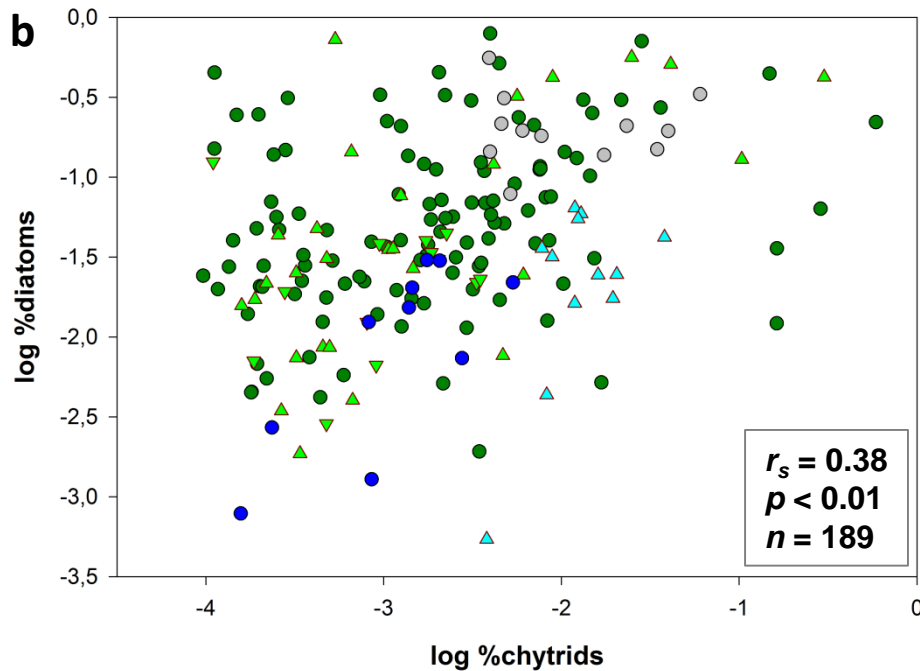

**Figure S1. Biotic and abiotic parameters correlated to proportions of total fungi or Chytridiomycota-like sequences.** Weak, but significant, positive correlations are present between proportions of chytrids and either chlorophyll *a* (**a**) or proportions of diatoms (**b**) for all sample types together. Note that data on chlorophyll *a* was not available for Lake Tahoe. A slightly stronger, but negative, correlation was seen between total fungi

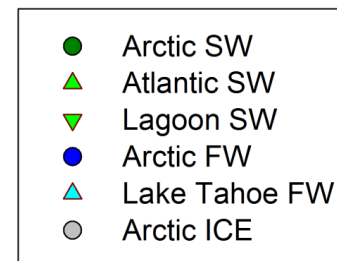

in temperate locations only and temperature (**c**). Listed are Spearman's *r* values along with the *p* values and sample sizes (*n*) for each plot. FW, freshwater; SW, seawater.

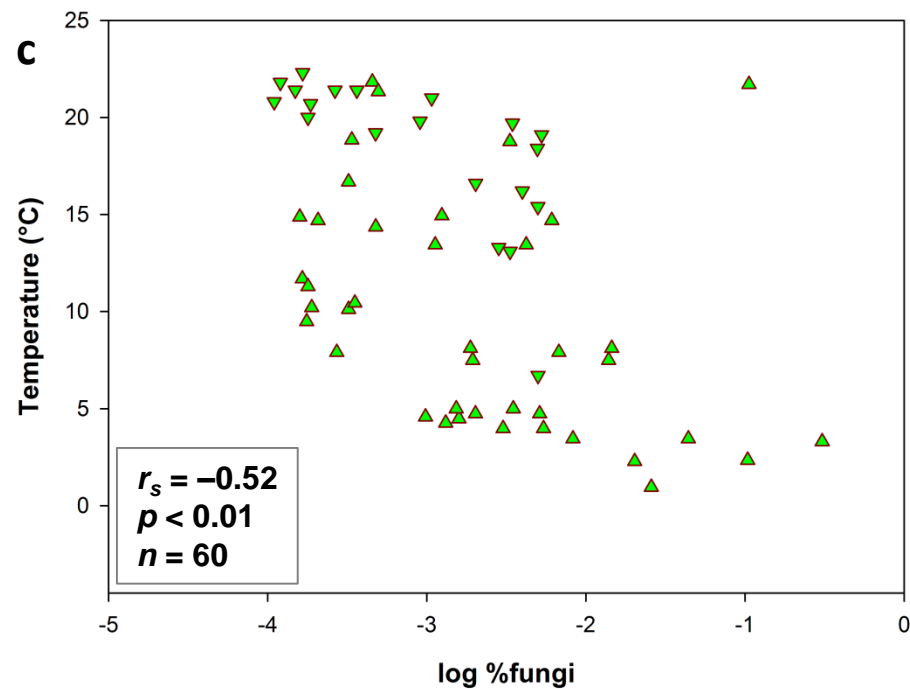

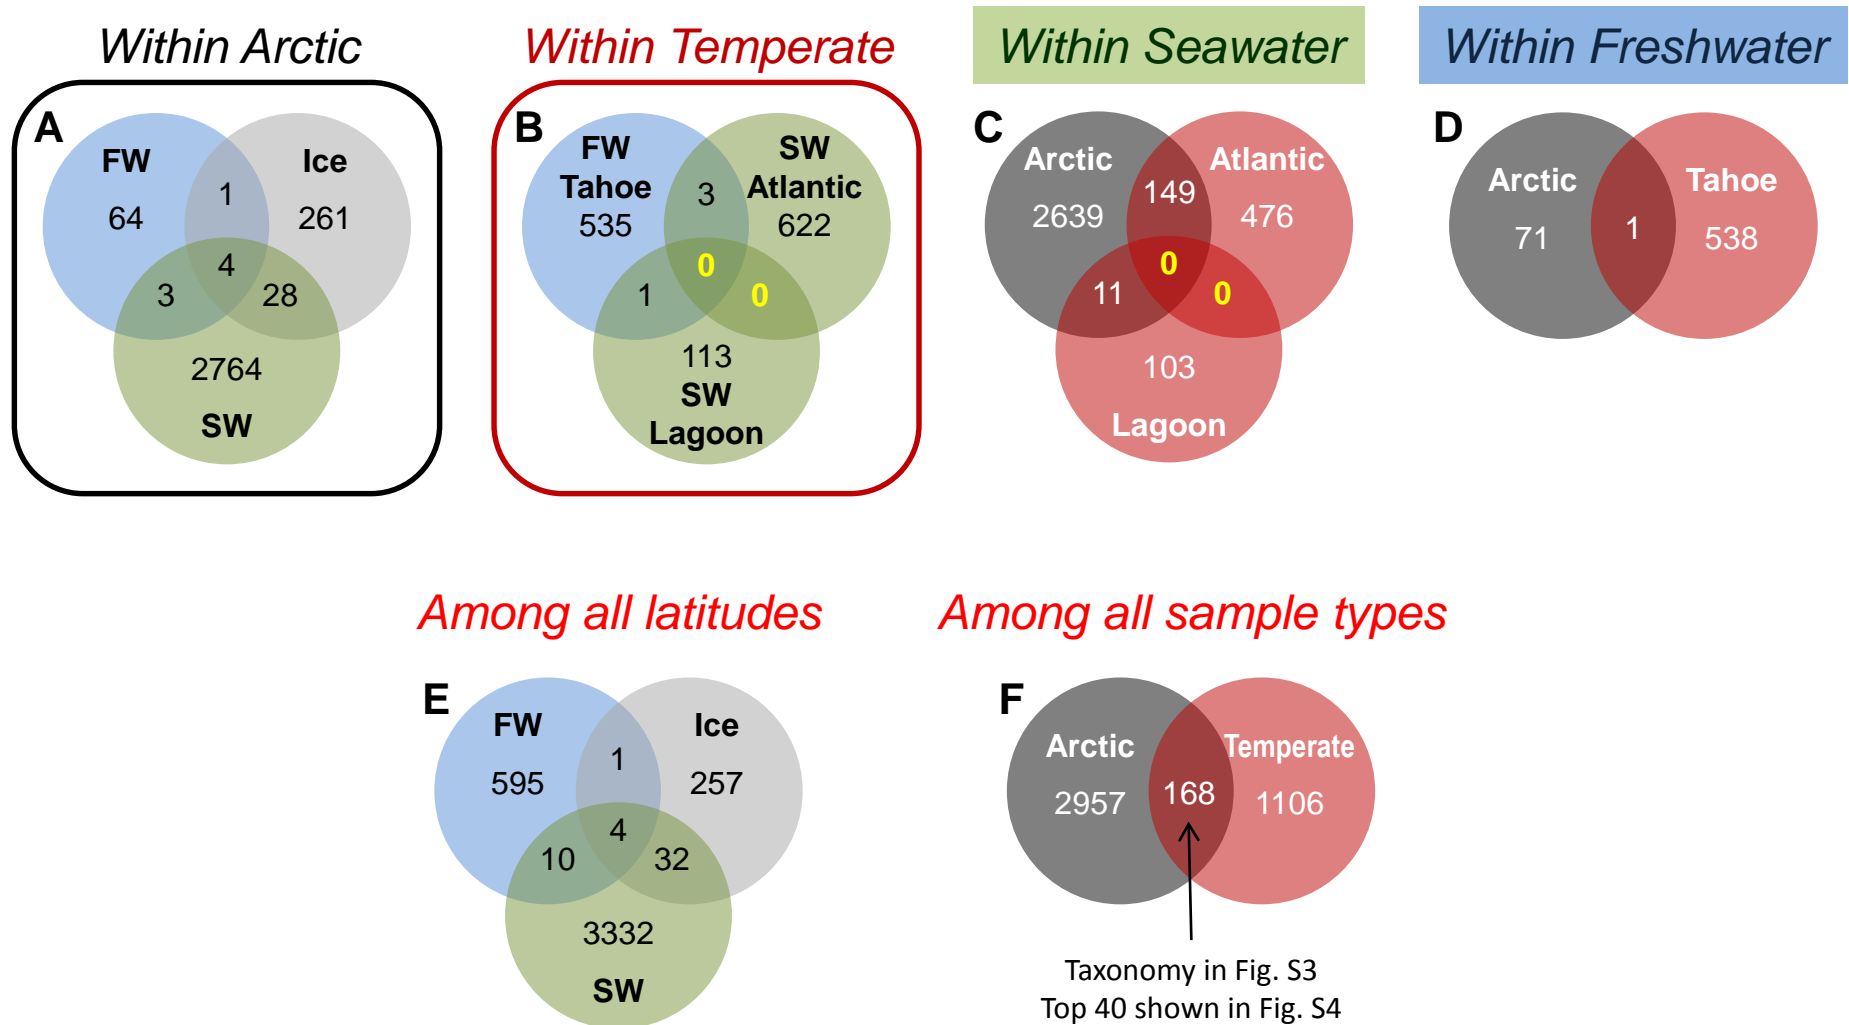

**Figure S2. Numbers of shared OTUs (98% identity) between the various sample types.** Color-coding for sample types matches Fig. 3 and case numbers (A-F) are referred to in Fig. S3. FW, freshwater; SW, seawater.

|               | # shared OTUs                    | Clone CFL161DB09 | Crypto-Rozella | Asco-Epicoccum | Asco-Mycochaetophora | Asco-Aureobasidium | Asco-Cladosporium | Asco-Cordyceps | Asco-Engyodontium | Asco-Eurotium | Asco-Meyerozyma | Asco-Mycosphaerella | Asco-Nectria | Asco-Sarocladium | Basidio-Leucosporidium | Basidio-Sporisorium | Unclassified |
|---------------|----------------------------------|------------------|----------------|----------------|----------------------|--------------------|-------------------|----------------|-------------------|---------------|-----------------|---------------------|--------------|------------------|------------------------|---------------------|--------------|
| <b>Case A</b> | Universal FW+Ice+SW              | 4                | 1              | -              | -                    | 2                  | -                 | -              | -                 | -             | -               | -                   | -            | -                | -                      | 1                   | -            |
|               | Shared FW+Ice                    | 1                | -              | -              | -                    | 1                  | -                 | -              | -                 | -             | -               | -                   | -            | -                | -                      | -                   | -            |
|               | Shared Ice+SW                    | 28               | 24             | -              | 1                    | -                  | -                 | -              | -                 | -             | -               | 1                   | -            | 1                | 1                      | -                   | -            |
|               | Shared SW+FW                     | 3                | 1              | -              | -                    | -                  | -                 | -              | -                 | -             | -               | -                   | -            | 1                | -                      | -                   | 1            |
| <b>Case B</b> | Universal Tahoe+Atlantic+Lagoon  | -                | -              | -              | -                    | -                  | -                 | -              | -                 | -             | -               | -                   | -            | -                | -                      | -                   | -            |
|               | Shared Tahoe+Atlantic            | 3                | -              | -              | -                    | 1                  | 1                 | -              | -                 | -             | -               | 1                   | -            | -                | -                      | -                   | -            |
|               | Shared Atlantic+Lagoon           | -                | -              | -              | -                    | -                  | -                 | -              | -                 | -             | -               | -                   | -            | -                | -                      | -                   | -            |
| <b>Case C</b> | Shared Lagoon+Tahoe              | 1                | -              | -              | -                    | 1                  | -                 | -              | -                 | -             | -               | -                   | -            | -                | -                      | -                   | -            |
|               | Universal Arctic+Atlantic+Lagoon | -                | -              | -              | -                    | -                  | -                 | -              | -                 | -             | -               | -                   | -            | -                | -                      | -                   | -            |
|               | Shared Arctic+Atlantic           | 149              | 105            | 11             | 2                    | 4                  | 5                 | 2              | 1                 | 2             | 2               | 1                   | 1            | 6                | 2                      | 2                   | 2            |
| <b>Case D</b> | Shared Atlantic+Lagoon           | -                | -              | -              | -                    | -                  | -                 | -              | -                 | -             | -               | -                   | -            | -                | -                      | -                   | -            |
|               | Shared Lagoon+Arctic             | 11               | 6              | -              | -                    | -                  | 3                 | 1              | -                 | -             | -               | -                   | -            | -                | 1                      | -                   | -            |
|               | Universal Arctic+Tahoe           | 1                | -              | -              | -                    | -                  | -                 | -              | -                 | -             | -               | -                   | -            | -                | -                      | -                   | 1            |
| <b>Case E</b> | Universal FW+Ice+SW              | 4                | 1              | -              | -                    | 2                  | -                 | -              | -                 | -             | -               | -                   | -            | -                | -                      | 1                   | -            |
|               | Shared FW+Ice                    | 1                | -              | -              | -                    | 1                  | -                 | -              | -                 | -             | -               | -                   | -            | -                | -                      | -                   | -            |
|               | Shared Ice+SW                    | 32               | 27             | -              | 1                    | 1                  | 1                 | -              | -                 | -             | -               | -                   | -            | 1                | 1                      | -                   | -            |
| <b>Case F</b> | Shared SW+FW                     | 10               | 1              | -              | -                    | 4                  | 1                 | -              | -                 | -             | -               | 2                   | -            | 1                | -                      | -                   | 1            |
|               | Universal Arctic+Temperate       | 168              | 114            | 11             | 2                    | 4                  | 11                | 3              | 1                 | 2             | 2               | 1                   | 2            | 1                | 6                      | 3                   | 2            |

**Figure S3. Taxonomic identities of the shared OTUs (98% identity) between the various sample types.** Color-coding for taxa matches Fig. 3 and case numbers (A-F) refer to Fig. S2. Asco, Ascomycota; Basidio, Basidiomycota; Crypto, Cryptomycota; FW, freshwater; SW, seawater.

**Figure S4. Top 40 OTUs.** Distribution of sequences within the top 40 shared OTUs (98% identity) showing vastly different profiles between Arctic and Temperate samples.

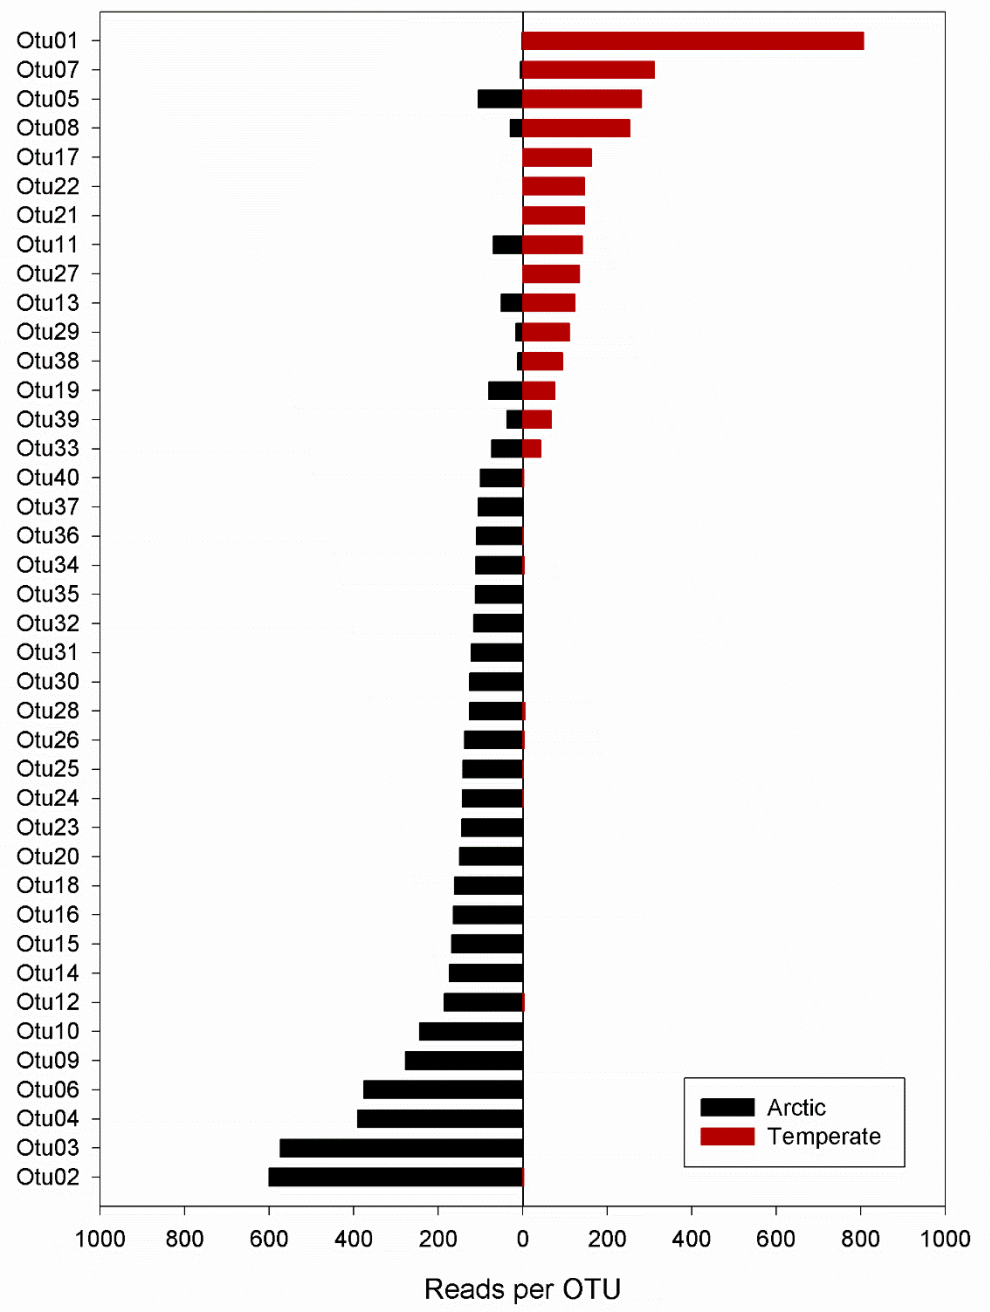

Supplement: srep30120-s2.pdf [file srep30120-s2.pdf]
