# Supplementary material for: Novel chytrid lineages dominate fungal sequences in diverse marine and freshwater habitats
Source: PubMed Central journal article supplement (PMC4957111; doi:10.1038/srep30120), 2016-07-22
Supplement: srep30120-s3.pdf [file srep30120-s3.pdf]

**Supplementary Information for:**

**Novel chytrid lineages dominate fungal sequences in diverse marine and freshwater habitats**

André M. Comeau, Warwick F. Vincent, Louis Bernier & Connie Lovejoy

**Table S1. Characteristics of the arctic and temperate samples sequenced (all projects/sampling date from 2003-2011).**

| Project (Years)       | Location <sup>a</sup> | Salinity <sup>b</sup> | # Samples      | # Stations | Depth <sup>c</sup> | Size Fraction <sup>d</sup> | Molecule | Number of pyrosequences |             |               | Accession   | Reference                       |
|-----------------------|-----------------------|-----------------------|----------------|------------|--------------------|----------------------------|----------|-------------------------|-------------|---------------|-------------|---------------------------------|
|                       |                       |                       |                |            |                    |                            |          | Raw                     | Post-Filter | Fungi (%)     |             |                                 |
| <b>Arctic Samples</b> |                       |                       |                |            |                    |                            |          |                         |             |               |             |                                 |
| AMCE (2003-10)        | CB/A.Gulf             | Marine                | 11             | 6          | SCM                | S                          | DNA      | 173,549                 | 108,679     | 2,791 (2.57)  | SRA029114   | Comeau et al., 2011             |
| AMELD (2008)          | Lake A                | FreshW                | 8              | 1          | M                  | L+S                        | DNA      | 70,330                  | 14,741      | 49 (0.33)     | SRA057195   | Charvet et al., 2012            |
|                       |                       | Marine                | 4              |            |                    |                            |          | 7,040                   | 51 (0.72)   |               |             |                                 |
| AMELD (2009)          | Lake A                | FreshW                | 4              | 1          | M                  | L                          | DNA      | 58,170                  | 29,325      | 29 (0.10)     |             |                                 |
|                       |                       | Marine                | 1              |            |                    |                            |          | 3,860                   | 6 (0.16)    |               |             |                                 |
| ANITA (2007)          | CB                    | Marine                | 11             | 4          | M                  | L                          | Both     | 143,779                 | 93,061      | 1,226 (1.32)  | PRJNA217362 | Comeau et al.,                  |
| ArcticNet (2010)      | BaffinB               | Marine                | 1 <sup>e</sup> | 1          | SCM                | S                          | DNA      | 46,600                  | 28,499      | 15 (0.05)     | PRJNA284115 | unpubl.                         |
| ArcticNet (2011)      | varied                | Marine                | 5              | 5          | SCM                | L                          | DNA      | 48,242                  | 40,192      | 113 (0.28)    | SRP058096   | Luddington et al.,<br>submitted |
| AOS (2005-11)         | Arctic Seas           | Marine                | 36             | 20         | M                  | L+S                        | DNA      | 429,492                 | 303,235     | 2,378 (0.78)  | SRP040734   | Thaler and Lovejoy,<br>2015     |
| ASID (2008)           | A.Gulf                | Ice                   | 12             | 5          | -                  | L+S                        | DNA      | 97,489                  | 21,829      | 383 (1.75)    | SRA054160   | Comeau et al., 2013             |
|                       |                       |                       |                |            |                    |                            | DNA      | 126,829                 | 45,296      | 788 (1.74)    |             |                                 |
| CFL (2007-8)          | A.Gulf                | Marine                | 48             | 12         | Sf<br>SCM          | L+S                        | RNA      | 126,286                 | 63,927      | 353 (0.55)    | PRJNA283142 | Lovejoy, unpubl.                |
|                       |                       |                       |                |            |                    |                            | DNA      | 133,284                 | 35,414      | 5,369 (15.16) |             |                                 |
|                       |                       |                       |                |            |                    |                            | RNA      | 143,141                 | 76,400      | 1,723 (2.26)  |             |                                 |
| Char Lake (2009)      | Char Lake             | Fresh                 | 1              | 1          | Sf                 | L                          | DNA      | 7,613                   | 4,676       | 8 (0.17)      | SRR2075391  | Charvet et al.,<br>unpubl.      |
| ICESCAPES (2010)      | Ber/Chuk              | Marine                | 23             | 12         | Sf                 | L                          | DNA      | 138,658                 | 64,159      | 882 (1.37)    | SRP029300   | Thaler and Lovejoy,<br>2015     |
|                       |                       |                       |                |            |                    | S                          | DNA      | 137,727                 | 49,451      | 263 (0.53)    |             |                                 |
| MALINA (2009)         | CB                    | Marine                | 24             | 6          | M                  | S                          | DNA      | 272,260                 | 113,342     | 417 (0.37)    | SRA063446   | Monier et al., 2013             |
| Ward Hunt Lake (2009) | WH Isl                | Fresh                 | 1              | 1          | Sf                 | L                          | DNA      | 7,534                   | 4,714       | 1 (0.02)      | SRP027540   | Charvet et al., 2014            |

### Temperate Samples

|                        |           |        |     |     |     |        |            |                    |                   |                          |                            |                              |
|------------------------|-----------|--------|-----|-----|-----|--------|------------|--------------------|-------------------|--------------------------|----------------------------|------------------------------|
| AquaMN MIST (2010)     | Magd Isl  | Marine | 32  | 6   | Sf  | L<br>S | RNA        | 156,033<br>252,979 | 62,875<br>109,328 | 5 (<0.01)<br>9 (<0.01)   | PRJNA289000<br>PRJNA288997 | Péquin, 2015                 |
| AquaMN seasonal (2009) | Magd Isl  | Marine | 10  | 1   | Sf  | L+S    | DNA        | 106,797            | 31,657            | 118 (0.37)               | SRP043016                  | Péquin et al., submitted     |
| CHONe (2009)           | ScotianS  | Marine | 7   | 7   | SCM | L      | DNA        | 67,168             | 55,889            | 4,185 (7.49)             | SRP058096                  | Dasilva et al., 2014         |
| CHONe (2010A)          | Gulf of M | Marine | 24  | 6   | M   | S      | DNA<br>RNA | 118,407<br>106,041 | 72,960<br>57,036  | 26 (0.04)<br>0           | SRP040423                  | Dasilva, 2014                |
| CHONe (2010B)          | Gulf of M | Marine | 44  | 4   | M   | L<br>S | DNA<br>RNA | 255,484<br>244,633 | 55,717<br>82,248  | 147 (0.26)<br>397 (0.48) |                            | Lovejoy, unpubl.             |
| Lake Tahoe (2011)      | CA/NV     | Fresh  | 12  | 4   | M   | S      | DNA        | 136,824            | 81,677            | 1,531 (1.87)             | PRJNA288969                | Vincent and Lovejoy, unpubl. |
| <b>Totals</b>          | –         | –      | 319 | 103 | –   | –      | –          | 3,651,419          | 1,717,227         | 23,263 (1.35)            |                            |                              |

<sup>a</sup>A.Gulf, Amundsen Gulf; BaffinB, Baffin Bay; Ber/Chuk, Bering Strait+Chukchi Sea; CA/NV, California/Nevada; CB, Canada Basin (including Beaufort Sea); Gulf of M, Gulf of Maine; Magd Isl, Magdalene Islands; ScotianS, Scotian Shelf; WH Isl, Ward Hunt Island.

<sup>b</sup>FreshW, freshwater.

<sup>c</sup>M, multiple depths; Sf, surface waters (0.5-12 m); SCM, subsurface chlorophyll *a* maximum.

<sup>d</sup>L, large size-fraction (3-50 µm); S, small size-fraction (0.2-3 µm).

<sup>e</sup>This one sample was selected for a GS-FLX+ long-read chemistry test.

### References

Charvet, S., Vincent, W.F., Comeau, A.M. & Lovejoy, C. Pyrosequencing analysis of the protist communities in a High Arctic meromictic lake: DNA preservation and change. *Front. Extreme Microbiol.* **3**, 422 (2012).

Charvet, S., Vincent, W.F. & Lovejoy, C. Effects of light and prey availability on Arctic freshwater protist communities examined by high-throughput DNA and RNA sequencing. *FEMS Microbiol. Ecol.* **88**, 550-564 (2014).

Comeau, A.M., Li, W.K.W., Tremblay, J.-E., Carmack, E.C. & Lovejoy, C. Changes in Arctic Ocean microbial community structure following the 2007 record sea ice minimum. *PLoS ONE* **6**, e27492 (2011).

Comeau, A.M. *et al.* Protists in Arctic drift and land-fast sea ice. *J. Phycol.* **49**, 229-240 (2013).

Dasilva, C. Picoplancton de l'Océan Atlantique Nord-Ouest : Diversité et structure des communautés eucaryotes. Université Laval, PhD thesis (2014).

- Dasilva, C., Li, W.K.W. & Lovejoy, C. Phylogenetic diversity of eukaryotic marine microbial plankton on the Scotian Shelf Northwestern Atlantic Ocean. *J. Plank. Res.* **36**, 344-363 (2014).
- Luddington, I., Lovejoy, C. & Kaczmarska, I. Arctic and Atlantic Ocean Thalassiosirales meta-communities detected using single-cell PCR and high throughput sequencing. *J. Plank. Res.*, under review.
- Monier, A. *et al.* Upper Arctic Ocean water masses harbor distinct communities of heterotrophic flagellates. *Biogeosciences* **10**, 4273-4286 (2013).
- Péquin, B. Structure et diversité de la communauté de protistes de la lagune de Havre-aux-Maisons, Canada. Université Laval, PhD thesis (2015).
- Thaler, M. & Lovejoy, C. Biogeography of heterotrophic flagellate populations indicates the presence of generalist and specialist taxa in the Arctic Ocean. *Appl. Environ. Microbiol.* **81**, 2137-2148 (2015).

**Table S2. Taxonomic breakdowns for all groups of arctic and temperate samples sequenced (FW, freshwater; SW, seawater).**

| level | rankID         | taxon                 | lvls | total | Arc_FW | Arc_ICE | Arc_SW | Temperate |         |           |
|-------|----------------|-----------------------|------|-------|--------|---------|--------|-----------|---------|-----------|
|       |                |                       |      |       |        |         |        | FW_Tahoe  | SW_Atl. | SW_Lagoon |
| 0     | 0              | Root                  | 1    | 23263 | 87     | 383     | 16375  | 1531      | 4755    | 132       |
| 1     | 0.1            | Eukaryota             | 4    | 23263 | 87     | 383     | 16375  | 1531      | 4755    | 132       |
| 2     | 0.1.8          | Fungi/Metazoa         | 2    | 23201 | 87     | 383     | 16345  | 1516      | 4744    | 126       |
| 3     | 0.1.8.1        | Fungi                 | 10   | 23119 | 87     | 383     | 16302  | 1483      | 4743    | 121       |
| 4     | 0.1.8.1.2      | Chytridiomycota       | 3    | 2949  | 18     | 1       | 1772   | 1131      | 22      | 5         |
| 5     | 0.1.8.1.2.1    | Chytridiomycetes      | 10   | 2929  | 16     | 1       | 1772   | 1120      | 15      | 5         |
| 6     | 0.1.8.1.2.1.1  | Chytridiales_sp.PL70  | 0    | 121   | 1      | 1       | 19     | 99        | 1       | 0         |
| 6     | 0.1.8.1.2.1.2  | Chytridium            | 0    | 20    | 0      | 0       | 5      | 11        | 3       | 1         |
| 6     | 0.1.8.1.2.1.3  | Cladochytrium         | 0    | 2     | 0      | 0       | 0      | 2         | 0       | 0         |
| 6     | 0.1.8.1.2.1.4  | Geranomyces           | 0    | 13    | 0      | 0       | 0      | 13        | 0       | 0         |
| 6     | 0.1.8.1.2.1.5  | Lacustromyces         | 0    | 6     | 0      | 0       | 0      | 6         | 0       | 0         |
| 6     | 0.1.8.1.2.1.8  | Powellomycetes        | 0    | 140   | 1      | 0       | 0      | 139       | 0       | 0         |
| 6     | 0.1.8.1.2.1.9  | Rhizophlyctis         | 0    | 15    | 0      | 0       | 0      | 15        | 0       | 0         |
| 6     | 0.1.8.1.2.1.10 | Rhizophyidium         | 0    | 2055  | 4      | 0       | 1694   | 353       | 0       | 4         |
| 6     | 0.1.8.1.2.1.11 | Spizellomyces         | 0    | 176   | 0      | 0       | 0      | 176       | 0       | 0         |
| 6     | 0.1.8.1.2.1.12 | unclassified          | 0    | 381   | 10     | 0       | 54     | 306       | 11      | 0         |
| 5     | 0.1.8.1.2.2    | Monoblepharidomycetes | 1    | 1     | 0      | 0       | 0      | 1         | 0       | 0         |
| 6     | 0.1.8.1.2.2.1  | Monoblepharis         | 0    | 1     | 0      | 0       | 0      | 1         | 0       | 0         |
| 5     | 0.1.8.1.2.3    | unclassified          | 1    | 19    | 2      | 0       | 0      | 10        | 7       | 0         |
| 6     | 0.1.8.1.2.3.1  | unclassified          | 0    | 19    | 2      | 0       | 0      | 10        | 7       | 0         |
| 4     | 0.1.8.1.3      | Cryptomycota          | 1    | 379   | 1      | 0       | 168    | 4         | 204     | 2         |
| 5     | 0.1.8.1.3.1    | Rozella               | 1    | 379   | 1      | 0       | 168    | 4         | 204     | 2         |
| 6     | 0.1.8.1.3.1.1  | Rozella               | 0    | 379   | 1      | 0       | 168    | 4         | 204     | 2         |
| 4     | 0.1.8.1.4      | Dikarya(Ascomycota)   | 9    | 5439  | 28     | 25      | 4929   | 56        | 363     | 38        |
| 5     | 0.1.8.1.4.3    | Dothideomycetes       | 9    | 3226  | 13     | 22      | 3061   | 50        | 61      | 19        |
| 6     | 0.1.8.1.4.3.1  | Aureobasidium         | 0    | 982   | 4      | 20      | 925    | 14        | 8       | 11        |

|   |                 |                 |   |      |   |   |      |    |     |    |
|---|-----------------|-----------------|---|------|---|---|------|----|-----|----|
| 6 | 0.1.8.1.4.3.2   | Botryosphaeria  | 0 | 1    | 1 | 0 | 0    | 0  | 0   | 0  |
| 6 | 0.1.8.1.4.3.3   | Cladosporium    | 0 | 57   | 0 | 0 | 30   | 2  | 23  | 2  |
| 6 | 0.1.8.1.4.3.4   | Epicoccum       | 0 | 2079 | 2 | 2 | 2059 | 1  | 13  | 2  |
| 6 | 0.1.8.1.4.3.5   | Leptosphaeria   | 0 | 40   | 4 | 0 | 17   | 6  | 12  | 1  |
| 6 | 0.1.8.1.4.3.7   | Mycosphaerella  | 0 | 29   | 1 | 0 | 3    | 23 | 2   | 0  |
| 6 | 0.1.8.1.4.3.8   | Rhytidhysterium | 0 | 1    | 0 | 0 | 0    | 0  | 0   | 1  |
| 6 | 0.1.8.1.4.3.9   | Teratosphaeria  | 0 | 6    | 0 | 0 | 6    | 0  | 0   | 0  |
| 6 | 0.1.8.1.4.3.10  | unclassified    | 0 | 31   | 1 | 0 | 21   | 4  | 3   | 2  |
| 5 | 0.1.8.1.4.4     | Eurotiomycetes  | 3 | 77   | 4 | 1 | 50   | 0  | 4   | 18 |
| 6 | 0.1.8.1.4.4.5   | Eurotium        | 0 | 61   | 4 | 1 | 49   | 0  | 4   | 3  |
| 6 | 0.1.8.1.4.4.6   | Talaromyces     | 0 | 15   | 0 | 0 | 0    | 0  | 0   | 15 |
| 6 | 0.1.8.1.4.4.7   | unclassified    | 0 | 1    | 0 | 0 | 1    | 0  | 0   | 0  |
| 5 | 0.1.8.1.4.8     | Leotiomycetes   | 2 | 7    | 5 | 0 | 2    | 0  | 0   | 0  |
| 6 | 0.1.8.1.4.8.1   | Blumeria        | 0 | 1    | 0 | 0 | 1    | 0  | 0   | 0  |
| 6 | 0.1.8.1.4.8.2   | Botryotinia     | 0 | 6    | 5 | 0 | 1    | 0  | 0   | 0  |
| 5 | 0.1.8.1.4.11    | Orbiliomycetes  | 1 | 1    | 1 | 0 | 0    | 0  | 0   | 0  |
| 6 | 0.1.8.1.4.11.1  | Orbilium        | 0 | 1    | 1 | 0 | 0    | 0  | 0   | 0  |
| 5 | 0.1.8.1.4.12    | Pezizomycetes   | 1 | 1    | 0 | 0 | 1    | 0  | 0   | 0  |
| 6 | 0.1.8.1.4.12.1  | Tuber           | 0 | 1    | 0 | 0 | 1    | 0  | 0   | 0  |
| 5 | 0.1.8.1.4.14    | Saccharomycetes | 4 | 21   | 2 | 0 | 10   | 3  | 6   | 0  |
| 6 | 0.1.8.1.4.14.1  | Candida         | 0 | 1    | 1 | 0 | 0    | 0  | 0   | 0  |
| 6 | 0.1.8.1.4.14.2  | Kluyveromyces   | 0 | 1    | 0 | 0 | 1    | 0  | 0   | 0  |
| 6 | 0.1.8.1.4.14.4  | Meyerozyma      | 0 | 17   | 0 | 0 | 8    | 3  | 6   | 0  |
| 6 | 0.1.8.1.4.14.6  | Saccharomyces   | 0 | 2    | 1 | 0 | 1    | 0  | 0   | 0  |
| 5 | 0.1.8.1.4.16    | Sordariomycetes | 6 | 335  | 1 | 1 | 62   | 0  | 271 | 0  |
| 6 | 0.1.8.1.4.16.5  | Cordyceps       | 0 | 47   | 0 | 0 | 11   | 0  | 36  | 0  |
| 6 | 0.1.8.1.4.16.6  | Isaria          | 0 | 4    | 0 | 0 | 0    | 0  | 4   | 0  |
| 6 | 0.1.8.1.4.16.8  | Nectria         | 0 | 4    | 0 | 0 | 4    | 0  | 0   | 0  |
| 6 | 0.1.8.1.4.16.9  | Neurospora      | 0 | 7    | 0 | 0 | 0    | 0  | 7   | 0  |
| 6 | 0.1.8.1.4.16.11 | Sarocladium     | 0 | 267  | 1 | 1 | 44   | 0  | 221 | 0  |
| 6 | 0.1.8.1.4.16.13 | unclassified    | 0 | 6    | 0 | 0 | 3    | 0  | 3   | 0  |

|   |                |                                   |   |       |    |     |      |   |      |    |
|---|----------------|-----------------------------------|---|-------|----|-----|------|---|------|----|
| 5 | 0.1.8.1.4.18   | mitosporic_Ascomycota             | 2 | 1745  | 0  | 1   | 1722 | 0 | 21   | 1  |
| 6 | 0.1.8.1.4.18.1 | Engyodontium                      | 0 | 104   | 0  | 0   | 87   | 0 | 16   | 1  |
| 6 | 0.1.8.1.4.18.2 | Mycochaetophora                   | 0 | 1641  | 0  | 1   | 1635 | 0 | 5    | 0  |
| 5 | 0.1.8.1.4.19   | unclassified                      | 1 | 26    | 2  | 0   | 21   | 3 | 0    | 0  |
| 6 | 0.1.8.1.4.19.1 | unclassified                      | 0 | 26    | 2  | 0   | 21   | 3 | 0    | 0  |
| 4 | 0.1.8.1.5      | Dikarya(Basidiomycota)            | 4 | 446   | 12 | 2   | 378  | 0 | 50   | 4  |
| 5 | 0.1.8.1.5.5    | Cystobasidiomycetes               | 1 | 4     | 0  | 0   | 4    | 0 | 0    | 0  |
| 6 | 0.1.8.1.5.5.1  | Cystobasidium                     | 0 | 4     | 0  | 0   | 4    | 0 | 0    | 0  |
| 5 | 0.1.8.1.5.7    | Exobasidiomycetes                 | 2 | 8     | 0  | 0   | 8    | 0 | 0    | 0  |
| 6 | 0.1.8.1.5.7.1  | Entyloma                          | 0 | 1     | 0  | 0   | 1    | 0 | 0    | 0  |
| 6 | 0.1.8.1.5.7.3  | Malassezia                        | 0 | 7     | 0  | 0   | 7    | 0 | 0    | 0  |
| 5 | 0.1.8.1.5.8    | Microbotryomycetes                | 1 | 284   | 11 | 1   | 222  | 0 | 48   | 2  |
| 6 | 0.1.8.1.5.8.1  | Leucosporidium                    | 0 | 284   | 11 | 1   | 222  | 0 | 48   | 2  |
| 5 | 0.1.8.1.5.13   | Ustilaginomycetes                 | 2 | 150   | 1  | 1   | 144  | 0 | 2    | 2  |
| 6 | 0.1.8.1.5.13.2 | Sporisorium                       | 0 | 146   | 1  | 1   | 140  | 0 | 2    | 2  |
| 6 | 0.1.8.1.5.13.5 | unclassified                      | 0 | 4     | 0  | 0   | 4    | 0 | 0    | 0  |
| 4 | 0.1.8.1.6      | Entomophthoromycota               | 1 | 1     | 0  | 0   | 1    | 0 | 0    | 0  |
| 5 | 0.1.8.1.6.1    | Entomophthoromycotina             | 1 | 1     | 0  | 0   | 1    | 0 | 0    | 0  |
| 6 | 0.1.8.1.6.1.1  | Entomophthora                     | 0 | 1     | 0  | 0   | 1    | 0 | 0    | 0  |
| 4 | 0.1.8.1.8      | Uncertae_sedis(ArcticBasalClones) | 1 | 13477 | 17 | 354 | 9010 | 0 | 4038 | 58 |
| 5 | 0.1.8.1.8.1    | ArcticBasalClones                 | 1 | 13477 | 17 | 354 | 9010 | 0 | 4038 | 58 |
| 6 | 0.1.8.1.8.1.1  | clone_CFL161DB09                  | 0 | 13477 | 17 | 354 | 9010 | 0 | 4038 | 58 |
| 4 | 0.1.8.1.11     | Uncertae_sedis(Mucoromycotina)    | 1 | 1     | 0  | 0   | 1    | 0 | 0    | 0  |
| 5 | 0.1.8.1.11.1   | Mucoromycotina                    | 1 | 1     | 0  | 0   | 1    | 0 | 0    | 0  |
| 6 | 0.1.8.1.11.1.2 | Mucor                             | 0 | 1     | 0  | 0   | 1    | 0 | 0    | 0  |
| 4 | 0.1.8.1.12     | Uncertae_sedis(Nephridiophagidae) | 1 | 1     | 0  | 0   | 0    | 1 | 0    | 0  |
| 5 | 0.1.8.1.12.1   | Nephridiophagidae                 | 1 | 1     | 0  | 0   | 0    | 1 | 0    | 0  |
| 6 | 0.1.8.1.12.1.1 | Nephridiophaga                    | 0 | 1     | 0  | 0   | 0    | 1 | 0    | 0  |
| 4 | 0.1.8.1.13     | Uncertae_sedis(Olpidiaceae)       | 1 | 1     | 0  | 0   | 0    | 1 | 0    | 0  |
| 5 | 0.1.8.1.13.1   | Olpidiaceae                       | 1 | 1     | 0  | 0   | 0    | 1 | 0    | 0  |
| 6 | 0.1.8.1.13.1.1 | Olpidium                          | 0 | 1     | 0  | 0   | 0    | 1 | 0    | 0  |

|   |                |              |   |     |    |   |    |     |    |    |
|---|----------------|--------------|---|-----|----|---|----|-----|----|----|
| 4 | 0.1.8.1.17     | unclassified | 1 | 425 | 11 | 1 | 43 | 290 | 66 | 14 |
| 5 | 0.1.8.1.17.1   | unclassified | 1 | 425 | 11 | 1 | 43 | 290 | 66 | 14 |
| 6 | 0.1.8.1.17.1.1 | unclassified | 0 | 425 | 11 | 1 | 43 | 290 | 66 | 14 |
| 3 | 0.1.8.3        | unclassified | 1 | 82  | 0  | 0 | 43 | 33  | 1  | 5  |
| 4 | 0.1.8.3.1      | unclassified | 1 | 82  | 0  | 0 | 43 | 33  | 1  | 5  |
| 5 | 0.1.8.3.1.1    | unclassified | 1 | 82  | 0  | 0 | 43 | 33  | 1  | 5  |
| 6 | 0.1.8.3.1.1.1  | unclassified | 0 | 82  | 0  | 0 | 43 | 33  | 1  | 5  |
| 2 | 0.1.22         | unclassified | 1 | 57  | 0  | 0 | 27 | 15  | 10 | 5  |
| 3 | 0.1.22.1       | unclassified | 1 | 57  | 0  | 0 | 27 | 15  | 10 | 5  |
| 4 | 0.1.22.1.1     | unclassified | 1 | 57  | 0  | 0 | 27 | 15  | 10 | 5  |
| 5 | 0.1.22.1.1.1   | unclassified | 1 | 57  | 0  | 0 | 27 | 15  | 10 | 5  |
| 6 | 0.1.22.1.1.1.1 | unclassified | 0 | 57  | 0  | 0 | 27 | 15  | 10 | 5  |
